# Supplementary material
Source: publisher figshare collection journal article supplement (https://acs.figshare.com/ndownloader/files/4244158)
Supplement: Supplementary file 1 [file 4244158]

  
data_ic13359 
  
_audit_creation_method            SHELXL-97 
_chemical_name_systematic 
; 
 ? 
; 
_chemical_name_common             ? 
_chemical_melting_point           ? 
_chemical_formula_moiety          ? 
_chemical_formula_sum 
 'C12 H11 N3 O4' 
_chemical_formula_weight          261.24 
  
loop_ 
 _atom_type_symbol 
 _atom_type_description 
 _atom_type_scat_dispersion_real 
 _atom_type_scat_dispersion_imag 
 _atom_type_scat_source 
 'C'  'C'   0.0033   0.0016 
 'International Tables Vol C Tables 4.2.6.8 and 6.1.1.4' 
 'H'  'H'   0.0000   0.0000 
 'International Tables Vol C Tables 4.2.6.8 and 6.1.1.4' 
 'N'  'N'   0.0061   0.0033 
 'International Tables Vol C Tables 4.2.6.8 and 6.1.1.4' 
 'O'  'O'   0.0106   0.0060 
 'International Tables Vol C Tables 4.2.6.8 and 6.1.1.4' 
  
_symmetry_cell_setting            Monoclinic 
_symmetry_space_group_name_H-M    C2/c 
  
loop_ 
 _symmetry_equiv_pos_as_xyz 
 'x, y, z' 
 '-x, y, -z+1/2' 
 'x+1/2, y+1/2, z' 
 '-x+1/2, y+1/2, -z+1/2' 
 '-x, -y, -z' 
 'x, -y, z-1/2' 
 '-x+1/2, -y+1/2, -z' 
 'x+1/2, -y+1/2, z-1/2' 
  
_cell_length_a                    24.398(4) 
_cell_length_b                    3.8017(6) 
_cell_length_c                    26.608(4) 
_cell_angle_alpha                 90.00 
_cell_angle_beta                  113.302(6) 
_cell_angle_gamma                 90.00 
_cell_volume                      2266.7(6) 
_cell_formula_units_Z             8 
_cell_measurement_temperature     150(2) 
_cell_measurement_reflns_used     all 
_cell_measurement_theta_min       1.00 
_cell_measurement_theta_max       25.00 
  
_exptl_crystal_description        needle 
_exptl_crystal_colour             yellow 
_exptl_crystal_size_max           0.80 
_exptl_crystal_size_mid           0.15 
_exptl_crystal_size_min           0.05 
_exptl_crystal_density_meas       not_measured 
_exptl_crystal_density_diffrn     1.531 
_exptl_crystal_density_method     'not measured' 
_exptl_crystal_F_000              1088 
_exptl_absorpt_coefficient_mu     0.118 
_exptl_absorpt_correction_type    multi-scan 
_exptl_absorpt_correction_T_min   0.9117 
_exptl_absorpt_correction_T_max   0.9941 
_exptl_absorpt_process_details    ? 
  
_exptl_special_details 
; 
 ? 
; 
  
_diffrn_ambient_temperature       150(2) 
_diffrn_radiation_wavelength      0.71073 
_diffrn_radiation_type            MoK\a 
_diffrn_radiation_source          'fine-focus sealed tube' 
_diffrn_radiation_monochromator   graphite 
_diffrn_measurement_device_type   'NONIUS KappaCCD' 
_diffrn_measurement_method        '\w scans' 
_diffrn_detector_area_resol_mean  ? 
_diffrn_standards_number          ? 
_diffrn_standards_interval_count  ? 
_diffrn_standards_interval_time   ? 
_diffrn_standards_decay_%         ? 
_diffrn_reflns_number             3611 
_diffrn_reflns_av_R_equivalents   0.0814 
_diffrn_reflns_av_sigmaI/netI     0.0777 
_diffrn_reflns_limit_h_min        -28 
_diffrn_reflns_limit_h_max        28 
_diffrn_reflns_limit_k_min        -4 
_diffrn_reflns_limit_k_max        4 
_diffrn_reflns_limit_l_min        -27 
_diffrn_reflns_limit_l_max        31 
_diffrn_reflns_theta_min          1.67 
_diffrn_reflns_theta_max          25.00 
_reflns_number_total              1950 
_reflns_number_gt                 1313 
_reflns_threshold_expression      >2sigma(I) 
  
_computing_data_collection        'NONIUS COLLECT' 
_computing_cell_refinement        DENZO-SMN 
_computing_data_reduction         DENZO-SMN 
_computing_structure_solution     'SHELXS-97 (Sheldrick, 1990)' 
_computing_structure_refinement   'SHELXL-97 (Sheldrick, 1997)' 
_computing_molecular_graphics     'Bruker SHELXTL' 
_computing_publication_material   'Bruker SHELXTL' 
  
_refine_special_details 
; 
 Refinement of F^2^ against ALL reflections.  The weighted R-factor wR and 
 goodness of fit S are based on F^2^, conventional R-factors R are based 
 on F, with F set to zero for negative F^2^. The threshold expression of 
 F^2^ > 2sigma(F^2^) is used only for calculating R-factors(gt) etc. and is 
 not relevant to the choice of reflections for refinement.  R-factors based 
 on F^2^ are statistically about twice as large as those based on F, and R- 
 factors based on ALL data will be even larger. 
; 
  
_refine_ls_structure_factor_coef  Fsqd 
_refine_ls_matrix_type            full 
_refine_ls_weighting_scheme       calc 
_refine_ls_weighting_details 
 'calc w=1/[\s^2^(Fo^2^)+(0.1011P)^2^+5.3868P] where P=(Fo^2^+2Fc^2^)/3' 
_atom_sites_solution_primary      direct 
_atom_sites_solution_secondary    difmap 
_atom_sites_solution_hydrogens    geom 
_refine_ls_hydrogen_treatment     constr 
_refine_ls_extinction_method      none 
_refine_ls_extinction_coef        ? 
_refine_ls_number_reflns          1950 
_refine_ls_number_parameters      175 
_refine_ls_number_restraints      0 
_refine_ls_R_factor_all           0.1106 
_refine_ls_R_factor_gt            0.0780 
_refine_ls_wR_factor_ref          0.2312 
_refine_ls_wR_factor_gt           0.2111 
_refine_ls_goodness_of_fit_ref    1.131 
_refine_ls_restrained_S_all       1.131 
_refine_ls_shift/su_max           0.000 
_refine_ls_shift/su_mean          0.000 
  
loop_ 
 _atom_site_label 
 _atom_site_type_symbol 
 _atom_site_fract_x 
 _atom_site_fract_y 
 _atom_site_fract_z 
 _atom_site_U_iso_or_equiv 
 _atom_site_adp_type 
 _atom_site_occupancy 
 _atom_site_symmetry_multiplicity 
 _atom_site_calc_flag 
 _atom_site_refinement_flags 
 _atom_site_disorder_assembly 
 _atom_site_disorder_group 
O1 O 0.42113(14) 0.5274(8) 0.00354(12) 0.0441(8) Uani 1 1 d . . . 
O2 O 0.56705(14) 0.0132(8) 0.21042(11) 0.0449(8) Uani 1 1 d . . . 
H2 H 0.5358 0.1158 0.1897 0.067 Uiso 1 1 calc R . . 
O3 O 0.71519(14) -0.1992(9) 0.06687(13) 0.0516(9) Uani 1 1 d . . . 
O4 O 0.76844(15) -0.4820(8) 0.14051(13) 0.0521(9) Uani 1 1 d . . . 
N1 N 0.39446(16) 0.5700(9) 0.07786(14) 0.0365(8) Uani 1 1 d . . . 
N2 N 0.47245(16) 0.3187(9) 0.14363(13) 0.0378(9) Uani 1 1 d . . . 
N3 N 0.72406(16) -0.3050(9) 0.11282(15) 0.0427(9) Uani 1 1 d . . . 
C1 C 0.4211(2) 0.4705(10) 0.13202(17) 0.0367(10) Uani 1 1 d . . . 
C2 C 0.43149(19) 0.4781(10) 0.05172(17) 0.0373(10) Uani 1 1 d . . . 
C3 C 0.48347(18) 0.3121(10) 0.09583(16) 0.0348(10) Uani 1 1 d . . . 
C4 C 0.53179(19) 0.1914(10) 0.08919(16) 0.0370(10) Uani 1 1 d . . . 
H4 H 0.5299 0.2164 0.0530 0.044 Uiso 1 1 calc R . . 
C5 C 0.58706(18) 0.0281(10) 0.12726(16) 0.0352(10) Uani 1 1 d . . . 
C6 C 0.60135(19) -0.0536(10) 0.18316(17) 0.0365(10) Uani 1 1 d . . . 
C7 C 0.65601(18) -0.2217(10) 0.21371(17) 0.0379(10) Uani 1 1 d . . . 
H7 H 0.6653 -0.2798 0.2509 0.045 Uiso 1 1 calc R . . 
C8 C 0.69576(19) -0.3027(10) 0.19124(17) 0.0396(10) Uani 1 1 d . . . 
H8 H 0.7325 -0.4147 0.2125 0.047 Uiso 1 1 calc R . . 
C9 C 0.68194(18) -0.2194(10) 0.13689(17) 0.0356(10) Uani 1 1 d . . . 
C10 C 0.62842(18) -0.0562(10) 0.10568(17) 0.0354(10) Uani 1 1 d . . . 
H10 H 0.6200 -0.0009 0.0685 0.042 Uiso 1 1 calc R . . 
C11 C 0.33539(19) 0.7289(12) 0.04978(18) 0.0436(11) Uani 1 1 d . . . 
H11A H 0.3047 0.5456 0.0408 0.065 Uiso 1 1 calc R . . 
H11B H 0.3333 0.8431 0.0161 0.065 Uiso 1 1 calc R . . 
H11C H 0.3286 0.9040 0.0737 0.065 Uiso 1 1 calc R . . 
C12 C 0.3938(2) 0.5356(11) 0.17123(17) 0.0447(11) Uani 1 1 d . . . 
H12A H 0.4196 0.4410 0.2071 0.067 Uiso 1 1 calc R . . 
H12B H 0.3547 0.4200 0.1585 0.067 Uiso 1 1 calc R . . 
H12C H 0.3888 0.7893 0.1743 0.067 Uiso 1 1 calc R . . 
  
loop_ 
 _atom_site_aniso_label 
 _atom_site_aniso_U_11 
 _atom_site_aniso_U_22 
 _atom_site_aniso_U_33 
 _atom_site_aniso_U_23 
 _atom_site_aniso_U_13 
 _atom_site_aniso_U_12 
O1 0.0519(19) 0.0351(17) 0.0436(19) 0.0027(14) 0.0171(14) 0.0033(15) 
O2 0.0496(18) 0.0398(18) 0.0446(18) 0.0066(14) 0.0179(14) 0.0064(15) 
O3 0.056(2) 0.047(2) 0.054(2) 0.0082(16) 0.0255(16) 0.0096(17) 
O4 0.0483(19) 0.0425(19) 0.064(2) 0.0058(16) 0.0208(16) 0.0134(16) 
N1 0.0398(19) 0.0218(16) 0.047(2) -0.0007(15) 0.0161(16) 0.0028(15) 
N2 0.047(2) 0.0224(16) 0.046(2) -0.0018(15) 0.0192(16) 0.0006(17) 
N3 0.046(2) 0.0256(18) 0.053(2) -0.0004(17) 0.0161(18) -0.0002(18) 
C1 0.046(2) 0.0176(18) 0.046(2) -0.0026(17) 0.0178(19) -0.0009(19) 
C2 0.042(2) 0.023(2) 0.044(3) -0.0019(17) 0.0138(19) -0.0016(18) 
C3 0.041(2) 0.0214(18) 0.041(2) -0.0004(17) 0.0156(19) 0.0016(19) 
C4 0.048(3) 0.0212(19) 0.039(2) -0.0016(17) 0.0151(19) -0.0038(19) 
C5 0.038(2) 0.0184(18) 0.046(2) -0.0009(17) 0.0130(18) 0.0010(17) 
C6 0.042(2) 0.0204(19) 0.047(2) 0.0008(17) 0.018(2) -0.0034(18) 
C7 0.043(2) 0.024(2) 0.042(2) 0.0018(17) 0.0114(19) -0.0027(19) 
C8 0.041(2) 0.0197(19) 0.052(3) 0.0032(18) 0.012(2) 0.0035(18) 
C9 0.038(2) 0.0194(18) 0.049(2) -0.0030(17) 0.0168(19) 0.0009(18) 
C10 0.040(2) 0.0216(19) 0.044(2) -0.0005(17) 0.0151(18) 0.0016(18) 
C11 0.047(3) 0.033(2) 0.050(3) 0.0028(19) 0.018(2) 0.007(2) 
C12 0.055(3) 0.027(2) 0.055(3) 0.0005(19) 0.025(2) 0.007(2) 
  
_geom_special_details 
; 
 All esds (except the esd in the dihedral angle between two l.s. planes) 
 are estimated using the full covariance matrix.  The cell esds are taken 
 into account individually in the estimation of esds in distances, angles 
 and torsion angles; correlations between esds in cell parameters are only 
 used when they are defined by crystal symmetry.  An approximate (isotropic) 
 treatment of cell esds is used for estimating esds involving l.s. planes. 
; 
  
loop_ 
 _geom_bond_atom_site_label_1 
 _geom_bond_atom_site_label_2 
 _geom_bond_distance 
 _geom_bond_site_symmetry_2 
 _geom_bond_publ_flag 
O1 C2 1.219(5) . ? 
O2 C6 1.331(5) . ? 
O3 N3 1.222(4) . ? 
O4 N3 1.240(5) . ? 
N1 C1 1.379(5) . ? 
N1 C2 1.385(5) . ? 
N1 C11 1.466(5) . ? 
N2 C1 1.300(5) . ? 
N2 C3 1.400(5) . ? 
N3 C9 1.447(5) . ? 
C1 C12 1.465(6) . ? 
C2 C3 1.485(6) . ? 
C3 C4 1.340(6) . ? 
C4 C5 1.466(6) . ? 
C5 C10 1.382(6) . ? 
C5 C6 1.421(6) . ? 
C6 C7 1.411(6) . ? 
C7 C8 1.361(6) . ? 
C8 C9 1.385(6) . ? 
C9 C10 1.386(6) . ? 
  
loop_ 
 _geom_angle_atom_site_label_1 
 _geom_angle_atom_site_label_2 
 _geom_angle_atom_site_label_3 
 _geom_angle 
 _geom_angle_site_symmetry_1 
 _geom_angle_site_symmetry_3 
 _geom_angle_publ_flag 
C1 N1 C2 108.9(3) . . ? 
C1 N1 C11 127.5(3) . . ? 
C2 N1 C11 123.6(3) . . ? 
C1 N2 C3 107.8(3) . . ? 
O3 N3 O4 122.7(4) . . ? 
O3 N3 C9 119.5(4) . . ? 
O4 N3 C9 117.7(4) . . ? 
N2 C1 N1 112.5(4) . . ? 
N2 C1 C12 125.0(4) . . ? 
N1 C1 C12 122.6(4) . . ? 
O1 C2 N1 125.7(4) . . ? 
O1 C2 C3 130.8(4) . . ? 
N1 C2 C3 103.5(3) . . ? 
C4 C3 N2 128.4(4) . . ? 
C4 C3 C2 124.2(4) . . ? 
N2 C3 C2 107.4(3) . . ? 
C3 C4 C5 132.1(4) . . ? 
C10 C5 C6 117.8(4) . . ? 
C10 C5 C4 115.8(4) . . ? 
C6 C5 C4 126.4(4) . . ? 
O2 C6 C7 115.3(4) . . ? 
O2 C6 C5 125.6(4) . . ? 
C7 C6 C5 119.1(4) . . ? 
C8 C7 C6 121.7(4) . . ? 
C7 C8 C9 119.0(4) . . ? 
C8 C9 C10 120.7(4) . . ? 
C8 C9 N3 119.2(4) . . ? 
C10 C9 N3 120.1(4) . . ? 
C5 C10 C9 121.6(4) . . ? 
  
_diffrn_measured_fraction_theta_max    0.972 
_diffrn_reflns_theta_full              25.00 
_diffrn_measured_fraction_theta_full   0.972 
_refine_diff_density_max    0.312 
_refine_diff_density_min   -0.359 
_refine_diff_density_rms    0.086 
